# Supplementary material
Source: PubMed Central journal article supplement (PMC10127945)
Supplement: NIHMS1885532-supplement-Supplementary_Table_1.pdf [file NIHMS1885532-supplement-Supplementary_Table_1.pdf]

| Pharmacokinetics of NMT5 in Golden Syrian Hamster (ng/mL) |      |       |         |      |    |      |
|-----------------------------------------------------------|------|-------|---------|------|----|------|
| Time (h)                                                  | 71   | 73    | 75      | Mean | SD |      |
| 0.5                                                       | 53.6 | 43.0  | 30.9    | 42.5 | ±  | 11.4 |
| 1                                                         | 76.0 | 30.0  | 46.8    | 50.9 | ±  | 23.3 |
| 3                                                         | 23.0 | 28.7  | 18.0    | 23.2 | ±  | 5.35 |
| 7                                                         | 10.7 | 6.69  | 7.52    | 8.30 | ±  | 2.12 |
| 24                                                        | 1.68 | < 0   | < 0     | 1.68 |    | ND   |
| 32                                                        | < 0  | 0.657 | No Peak | 0.66 |    | ND   |
| 48                                                        | 1.34 | 1.18  | 0.70    | 1.07 | ±  | 0.3  |

| Compound    | Route | Dose    | t <sub>1/2</sub> | C <sub>max</sub> | T <sub>max</sub> | AUC <sub>0-24</sub> | AUC <sub>LAST</sub> | AUC <sub>INF</sub> | Vd     | CI          | MRT <sub>LAST</sub> |
|-------------|-------|---------|------------------|------------------|------------------|---------------------|---------------------|--------------------|--------|-------------|---------------------|
|             |       | (mg/kg) | (hr)             | (ng/mL)          | (hr)             | (hr*ng/mL)          | (hr*ng/mL)          | (hr*ng/mL)         | (L/kg) | (mL/min/kg) | (hr)                |
| <b>NMT5</b> | PO    | 10      | 10.56            | 55.3             | 0.8              | 234                 | 266                 | 277                | 557    | 614         | 9.52                |

| Pharmacokinetics of NMT3 in Golden Syrian Hamster (ng/mL) |     |      |      |      |      |      |      |        |
|-----------------------------------------------------------|-----|------|------|------|------|------|------|--------|
| Time (h)                                                  | 372 | 373  | 374  | 375  | 376  | 377  | Mean | SD     |
| 0.5                                                       | 122 | 67.1 | 59.1 | 31.8 | 49.3 | 226  | 92.6 | ± 72.1 |
| 1                                                         | 113 | 77.5 | 104  | 109  | 74.7 | 178  | 109  | ± 37.3 |
| 3                                                         |     |      |      | 84.4 | 65.3 | 77.0 | 75.6 | ± 9.63 |
| 7                                                         |     |      |      | 32.5 | 20.1 | 27.3 | 26.6 | ± 6.23 |
| 24                                                        |     |      |      | BQL  | < 0  | 9.44 | 9.44 | ND     |

| Compound    | Route | Dose    | t <sub>1/2</sub> | C <sub>max</sub> | T <sub>max</sub> | AUC <sub>0-24</sub> | AUC <sub>LAST</sub> | AUC <sub>INF</sub> | Vd     | CI          | MRT <sub>LAST</sub> |
|-------------|-------|---------|------------------|------------------|------------------|---------------------|---------------------|--------------------|--------|-------------|---------------------|
|             |       | (mg/kg) | (hr)             | (ng/mL)          | (hr)             | (hr*ng/mL)          | (hr*ng/mL)          | (hr*ng/mL)         | (L/kg) | (mL/min/kg) | (hr)                |
| <b>NMT3</b> | PO    | 10      | 7.90             | 109              | 1                | 770                 | 770                 | 870                | 131    | 191         | 6.14                |

ND: Not determined  
BQL: Below the quantifiable limit

## Supplementary Table 1
